# Supplementary material for: Comparing families of olefin polymerization precatalysts using the percentage of buried volume
Source: Royal Society of Chemistry journal article supplement (doi:10.1039/b910036a), 2009-01-01
Supplement: b910036a.pdf [file b910036a.pdf]

**Supporting Information**

for

**Comparing families of olefins polymerization  
precatalysts using the percent of buried volume**

**Albert Poater, and Luigi Cavallo\***

*MoLNaC - Modeling Lab for Nanostructures and Catalysis, Dipartimento di Chimica, Università di Salerno, Via Ponte  
don Melillo, I-84084 Fisciano (SA), Italy.*

**Table S1.** xyz coordinate data sets for **1-26** DFT optimized complexes.

| <b>1</b> |           |           |           | <b>2</b> |           |           |           |
|----------|-----------|-----------|-----------|----------|-----------|-----------|-----------|
| Zr       | 0.000000  | 0.000000  | 0.825137  | Zr       | 0.000000  | 0.000000  | 0.669609  |
| Si       | 0.000000  | 0.000000  | -2.578424 | Si       | 0.000000  | 0.000000  | -2.707164 |
| C        | -0.746115 | 1.173953  | -1.289703 | C        | -0.381035 | 1.341100  | -1.424399 |
| C        | 0.746115  | -1.173953 | -1.289703 | C        | 0.381035  | -1.341100 | -1.424399 |
| C        | 0.000000  | 2.142000  | -0.528256 | C        | 0.607896  | 2.071909  | -0.674887 |
| C        | -0.749156 | 2.496591  | 0.639055  | C        | 0.000000  | 2.661592  | 0.487332  |
| C        | -1.945205 | 1.733353  | 0.638820  | C        | -1.357547 | 2.231100  | 0.500950  |
| C        | -1.938230 | 0.904409  | -0.528307 | C        | -1.593913 | 1.418540  | -0.653167 |
| H        | 0.982988  | 2.554344  | -0.795617 | H        | 1.663152  | 2.198017  | -0.957548 |
| H        | -0.435529 | 3.207678  | 1.413298  | H        | -2.095961 | 2.478012  | 1.274834  |
| H        | -2.722585 | 1.747889  | 1.412654  | H        | -2.552930 | 0.944804  | -0.905461 |
| H        | -2.726048 | 0.186664  | -0.796806 | C        | -0.607896 | -2.071909 | -0.674887 |
| C        | 0.000000  | -2.142000 | -0.528256 | C        | 0.000000  | -2.661592 | 0.487332  |
| C        | 0.749156  | -2.496591 | 0.639055  | C        | 1.357547  | -2.231100 | 0.500950  |
| C        | 1.945205  | -1.733353 | 0.638820  | C        | 1.593913  | -1.418540 | -0.653167 |
| C        | 1.938230  | -0.904409 | -0.528307 | H        | -1.663152 | -2.198017 | -0.957548 |
| H        | -0.982988 | -2.554344 | -0.795617 | H        | 2.095961  | -2.478012 | 1.274834  |
| H        | 0.435529  | -3.207678 | 1.413298  | H        | 2.552930  | -0.944804 | -0.905461 |
| H        | 2.722585  | -1.747889 | 1.412654  | C        | 0.652577  | 3.604173  | 1.456095  |
| H        | 2.726048  | -0.186664 | -0.796806 | H        | 0.755372  | 4.612742  | 0.999952  |
| C        | -1.324108 | -0.839641 | -3.626564 | H        | 0.053935  | 3.709493  | 2.382183  |
| H        | -1.825109 | -0.101825 | -4.288018 | H        | 1.664622  | 3.252091  | 1.741025  |
| H        | -0.874601 | -1.625328 | -4.269630 | C        | -0.652577 | -3.604173 | 1.456095  |
| H        | -2.106911 | -1.320001 | -3.004050 | H        | -0.755372 | -4.612742 | 0.999952  |
| C        | 1.324108  | 0.839641  | -3.626564 | H        | -0.053935 | -3.709493 | 2.382183  |
| H        | 1.825109  | 0.101825  | -4.288018 | H        | -1.664622 | -3.252091 | 1.741025  |
| H        | 0.874601  | 1.625328  | -4.269630 | C        | 1.507751  | 0.428555  | -3.757246 |
| H        | 2.106911  | 1.320001  | -3.004050 | H        | 1.785700  | -0.425526 | -4.410023 |
| Cl       | -1.606678 | -1.023048 | 2.355537  | H        | 1.295340  | 1.302413  | -4.408511 |
| Cl       | 1.606678  | 1.023048  | 2.355537  | H        | 2.390849  | 0.678549  | -3.134057 |
|          |           |           |           | C        | -1.507751 | -0.428555 | -3.757246 |
|          |           |           |           | H        | -1.785700 | 0.425526  | -4.410023 |
|          |           |           |           | H        | -1.295340 | -1.302413 | -4.408511 |
|          |           |           |           | H        | -2.390849 | -0.678549 | -3.134057 |
|          |           |           |           | Cl       | -1.839170 | -0.519959 | 2.198088  |
|          |           |           |           | Cl       | 1.839170  | 0.519959  | 2.198088  |

| <b>3</b> |           |           |           | <b>4</b> |           |           |           |
|----------|-----------|-----------|-----------|----------|-----------|-----------|-----------|
| Zr       | 0.000000  | 0.000000  | 0.155655  | Zr       | 0.000000  | 0.000000  | 0.498694  |
| Si       | 0.000000  | 0.000000  | -3.195848 | C        | 0.566501  | 1.297525  | -1.587920 |
| C        | 0.332646  | 1.359895  | -1.934882 | C        | -0.566501 | -1.297525 | -1.587920 |
| C        | -0.332646 | -1.359895 | -1.934882 | C        | 1.692340  | 1.421045  | -0.707322 |
| C        | 1.574010  | 1.464010  | -1.205111 | C        | 1.342318  | 2.218714  | 0.420795  |
| C        | 1.387567  | 2.302318  | -0.053821 | C        | 0.000000  | 2.689571  | 0.222567  |
| C        | 0.000000  | 2.630499  | -0.023177 | C        | -0.499869 | 2.095657  | -1.013505 |
| C        | -0.660945 | 2.073049  | -1.168394 | C        | 2.666732  | 0.937823  | -0.865823 |
| H        | 2.531283  | 1.026441  | -1.519191 | C        | -0.824906 | 3.582048  | 0.969872  |
| H        | -0.498869 | 3.237315  | 0.743384  | C        | -1.821387 | 2.414246  | -1.462363 |
| C        | -1.574010 | -1.464010 | -1.205111 | C        | -1.692340 | -1.421045 | -0.707322 |
| C        | -1.387567 | -2.302318 | -0.053821 | C        | -1.342318 | -2.218714 | 0.420795  |
| C        | 0.000000  | -2.630499 | -0.023177 | C        | 0.000000  | -2.689571 | 0.222567  |
| C        | 0.660945  | -2.073049 | -1.168394 | C        | 0.499869  | -2.095657 | -1.013505 |
| H        | -2.531283 | -1.026441 | -1.519191 | H        | -2.666732 | -0.937823 | -0.865823 |
| H        | 0.498869  | -3.237315 | 0.743384  | C        | 0.824906  | -3.582048 | 0.969872  |
| C        | 2.473630  | 2.932983  | 0.823276  | C        | 1.821387  | -2.414246 | -1.462363 |
| C        | -2.473630 | -2.932983 | 0.823276  | C        | -2.094954 | 3.875527  | 0.496809  |
| C        | -2.656590 | -4.389768 | 0.309137  | C        | -2.591140 | 3.294417  | -0.713643 |
| H        | -3.457165 | -4.900264 | 0.885994  | H        | -0.449095 | 4.027720  | 1.903506  |
| H        | -2.942390 | -4.406456 | -0.763429 | H        | -2.739452 | 4.569571  | 1.058620  |
| H        | -1.723287 | -4.979278 | 0.423017  | H        | -3.602816 | 3.560284  | -1.058630 |
| C        | 2.656590  | 4.389768  | 0.309137  | H        | -2.208633 | 1.998054  | -2.405242 |
| H        | 3.457165  | 4.900264  | 0.885994  | C        | 2.094954  | -3.875527 | 0.496809  |
| H        | 2.942390  | 4.406456  | -0.763429 | C        | 2.591140  | -3.294417 | -0.713643 |
| H        | 1.723287  | 4.979278  | 0.423017  | H        | 0.449095  | -4.027720 | 1.903506  |
| C        | 3.818632  | 2.187755  | 0.682294  | H        | 2.739452  | -4.569571 | 1.058620  |
| H        | 3.726873  | 1.127881  | 0.991916  | H        | 3.602816  | -3.560284 | -1.058630 |
| H        | 4.197529  | 2.222203  | -0.361020 | H        | 2.208633  | -1.998054 | -2.405242 |
| H        | 4.585314  | 2.669186  | 1.324378  | C        | -0.534866 | -0.559434 | -2.907162 |
| C        | -3.818632 | -2.187755 | 0.682294  | C        | 0.534866  | 0.559434  | -2.907162 |
| H        | -3.726873 | -1.127881 | 0.991916  | H        | -1.540038 | -0.126096 | -3.089131 |
| H        | -4.197529 | -2.222203 | -0.361020 | H        | -0.352130 | -1.268528 | -3.745328 |
| H        | -4.585314 | -2.669186 | 1.324378  | H        | 1.540038  | 0.126096  | -3.089131 |
| C        | -2.051643 | -2.976142 | 2.310582  | H        | 0.352130  | 1.268528  | -3.745328 |
| H        | -2.827367 | -3.498879 | 2.908833  | H        | -1.997128 | -2.462505 | 1.265662  |
| H        | -1.098756 | -3.526945 | 2.452384  | H        | 1.997128  | 2.462505  | 1.265662  |
| H        | -1.926668 | -1.954622 | 2.720334  | Cl       | -1.786371 | 0.597900  | 2.038453  |
| C        | 2.051643  | 2.976142  | 2.310582  | Cl       | 1.786371  | -0.597900 | 2.038453  |
| H        | 2.827367  | 3.498879  | 2.908833  |          |           |           |           |
| H        | 1.098756  | 3.526945  | 2.452384  |          |           |           |           |
| H        | 1.926668  | 1.954622  | 2.720334  |          |           |           |           |
| C        | -2.104685 | 2.314447  | -1.528194 |          |           |           |           |
| H        | -2.746372 | 2.327644  | -0.624484 |          |           |           |           |
| H        | -2.213430 | 3.298585  | -2.034769 |          |           |           |           |
| H        | -2.502138 | 1.548153  | -2.223125 |          |           |           |           |
| C        | 2.104685  | -2.314447 | -1.528194 |          |           |           |           |
| H        | 2.746372  | -2.327644 | -0.624484 |          |           |           |           |
| H        | 2.213430  | -3.298585 | -2.034769 |          |           |           |           |
| H        | 2.502138  | -1.548153 | -2.223125 |          |           |           |           |
| H        | -1.200677 | 0.265691  | -4.055039 |          |           |           |           |
| H        | 1.200677  | -0.265691 | -4.055039 |          |           |           |           |
| Cl       | -1.797180 | 0.600232  | 1.712847  |          |           |           |           |
| Cl       | 1.797180  | -0.600232 | 1.712847  |          |           |           |           |

| <b>5</b> |           |           |           | <b>6</b> |           |           |           |
|----------|-----------|-----------|-----------|----------|-----------|-----------|-----------|
| Zr       | 0.000000  | 0.000000  | 0.366861  | Zr       | 0.000000  | 0.000000  | 0.692879  |
| C        | 0.563588  | 1.296564  | -1.694559 | Si       | 0.000000  | 0.000000  | -2.676320 |
| C        | -0.563588 | -1.296564 | -1.694559 | C        | 0.901412  | 1.067308  | -1.397874 |
| C        | 1.694925  | 1.447066  | -0.822542 | C        | -0.901412 | -1.067308 | -1.397874 |
| C        | 1.362900  | 2.264093  | 0.301973  | C        | 2.033805  | 0.578652  | -0.644458 |
| C        | 0.000000  | 2.696970  | 0.106148  | C        | 2.235362  | 1.368968  | 0.521739  |
| C        | -0.505821 | 2.087265  | -1.119058 | C        | 1.261015  | 2.421625  | 0.510151  |
| H        | 2.675709  | 0.977410  | -0.987161 | C        | 0.413305  | 2.224116  | -0.664455 |
| C        | 2.294727  | 2.724194  | 1.385785  | H        | 2.639702  | -0.299898 | -0.910206 |
| C        | -0.826183 | 3.592689  | 0.848081  | H        | 3.017098  | 1.218173  | 1.275945  |
| C        | -1.835762 | 2.386550  | -1.556865 | C        | 1.037184  | 3.528022  | 1.381943  |
| C        | -1.694925 | -1.447066 | -0.822542 | C        | -0.652083 | 3.148042  | -0.914597 |
| C        | -1.362900 | -2.264093 | 0.301973  | C        | -2.033805 | -0.578652 | -0.644458 |
| C        | 0.000000  | -2.696970 | 0.106148  | C        | -2.235362 | -1.368968 | 0.521739  |
| C        | 0.505821  | -2.087265 | -1.119058 | C        | -1.261015 | -2.421625 | 0.510151  |
| H        | -2.675709 | -0.977410 | -0.987161 | C        | -0.413305 | -2.224116 | -0.664455 |
| C        | -2.294727 | -2.724194 | 1.385785  | H        | -2.639702 | 0.299898  | -0.910206 |
| C        | 0.826183  | -3.592689 | 0.848081  | H        | -3.017098 | -1.218173 | 1.275945  |
| C        | 1.835762  | -2.386550 | -1.556865 | C        | -1.037184 | -3.528022 | 1.381943  |
| C        | -2.105407 | 3.867103  | 0.387130  | C        | 0.652083  | -3.148042 | -0.914597 |
| C        | -2.608297 | 3.266403  | -0.810518 | C        | 0.000000  | 4.403337  | 1.097513  |
| H        | -0.447185 | 4.059268  | 1.770116  | C        | -0.839675 | 4.213706  | -0.045962 |
| H        | -2.750329 | 4.561833  | 0.947686  | H        | 1.680545  | 3.675235  | 2.263029  |
| H        | -3.626302 | 3.517007  | -1.148314 | H        | -0.184468 | 5.264820  | 1.758297  |
| H        | -2.227928 | 1.955500  | -2.490924 | H        | -1.647524 | 4.936709  | -0.240566 |
| C        | 2.105407  | -3.867103 | 0.387130  | H        | -1.291991 | 3.032482  | -1.801802 |
| C        | 2.608297  | -3.266403 | -0.810518 | C        | 0.000000  | -4.403337 | 1.097513  |
| H        | 0.447185  | -4.059268 | 1.770116  | C        | 0.839675  | -4.213706 | -0.045962 |
| H        | 2.750329  | -4.561833 | 0.947686  | H        | -1.680545 | -3.675235 | 2.263029  |
| H        | 3.626302  | -3.517007 | -1.148314 | H        | 0.184468  | -5.264820 | 1.758297  |
| H        | 2.227928  | -1.955500 | -2.490924 | H        | 1.647524  | -4.936709 | -0.240566 |
| H        | 1.766349  | 2.863876  | 2.350339  | H        | 1.291991  | -3.032482 | -1.801802 |
| H        | 3.105620  | 1.989103  | 1.554206  | C        | 1.227200  | -0.941648 | -3.761916 |
| H        | 2.760487  | 3.697606  | 1.114400  | H        | 0.718385  | -1.752550 | -4.324383 |
| H        | -1.766349 | -2.863876 | 2.350339  | H        | 1.679148  | -0.246315 | -4.500768 |
| H        | -3.105620 | -1.989103 | 1.554206  | H        | 2.057517  | -1.394937 | -3.183485 |
| H        | -2.760487 | -3.697606 | 1.114400  | C        | -1.227200 | 0.941648  | -3.761916 |
| C        | -0.535648 | -0.557711 | -3.014028 | H        | -0.718385 | 1.752550  | -4.324383 |
| C        | 0.535648  | 0.557711  | -3.014028 | H        | -1.679148 | 0.246315  | -4.500768 |
| H        | -1.540623 | -0.122053 | -3.192354 | H        | -2.057517 | 1.394937  | -3.183485 |
| H        | -0.358744 | -1.266706 | -3.854199 | Cl       | -1.370373 | 1.279468  | 2.238123  |
| H        | 1.540623  | 0.122053  | -3.192354 | Cl       | 1.370373  | -1.279468 | 2.238123  |
| H        | 0.358744  | 1.266706  | -3.854199 |          |           |           |           |
| Cl       | -1.785651 | 0.594905  | 1.913512  |          |           |           |           |
| Cl       | 1.785651  | -0.594905 | 1.913512  |          |           |           |           |

| <b>7</b> |           |           |           | <b>8</b> |           |           |           |
|----------|-----------|-----------|-----------|----------|-----------|-----------|-----------|
| Zr       | 0.000000  | 0.000000  | 0.660129  | Zr       | 0.000000  | 0.000000  | 0.569916  |
| C        | 0.000000  | 0.000000  | -2.514261 | Si       | 0.000000  | 0.000000  | -2.766717 |
| C        | 0.761181  | 0.910490  | -1.519886 | C        | 0.694664  | 1.215759  | -1.495679 |
| C        | -0.761181 | -0.910490 | -1.519886 | C        | -0.694664 | -1.215759 | -1.495679 |
| C        | 1.939714  | 0.478250  | -0.811307 | C        | 1.908824  | 0.963826  | -0.750120 |
| C        | 2.204087  | 1.343437  | 0.287759  | C        | 1.986905  | 1.792213  | 0.409106  |
| C        | 1.221720  | 2.383521  | 0.266778  | C        | 0.806175  | 2.619853  | 0.403294  |
| C        | 0.301824  | 2.116046  | -0.844271 | C        | 0.000000  | 2.258661  | -0.759637 |
| H        | 2.534203  | -0.414010 | -1.046941 | H        | 2.677606  | 0.225611  | -1.023936 |
| H        | 3.033660  | 1.246536  | 0.997991  | C        | 3.135851  | 1.894307  | 1.368274  |
| C        | 1.050090  | 3.533540  | 1.094232  | C        | 0.383465  | 3.669255  | 1.271609  |
| C        | -0.771139 | 3.043104  | -1.071966 | C        | -1.226282 | 2.958357  | -0.999467 |
| C        | -1.939714 | -0.478250 | -0.811307 | C        | -1.908824 | -0.963826 | -0.750120 |
| C        | -2.204087 | -1.343437 | 0.287759  | C        | -1.986905 | -1.792213 | 0.409106  |
| C        | -1.221720 | -2.383521 | 0.266778  | C        | -0.806175 | -2.619853 | 0.403294  |
| C        | -0.301824 | -2.116046 | -0.844271 | C        | 0.000000  | -2.258661 | -0.759637 |
| H        | -2.534203 | 0.414010  | -1.046941 | H        | -2.677606 | -0.225611 | -1.023936 |
| H        | -3.033660 | -1.246536 | 0.997991  | C        | -3.135851 | -1.894307 | 1.368274  |
| C        | -1.050090 | -3.533540 | 1.094232  | C        | 0.383465  | -3.669255 | 1.271609  |
| C        | 0.771139  | -3.043104 | -1.071966 | C        | 1.226282  | -2.958357 | -0.999467 |
| C        | 0.000000  | 4.397995  | 0.833995  | C        | -0.807726 | 4.326512  | 0.999836  |
| C        | -0.902284 | 4.151313  | -0.248587 | C        | -1.608082 | 3.972242  | -0.132133 |
| H        | 1.750850  | 3.719668  | 1.922690  | H        | 0.997173  | 3.949256  | 2.141739  |
| H        | -0.144393 | 5.291758  | 1.460684  | H        | -1.146465 | 5.139709  | 1.660812  |
| H        | -1.718985 | 4.866066  | -0.436451 | H        | -2.542580 | 4.524257  | -0.319747 |
| H        | -1.468204 | 2.904587  | -1.908204 | H        | -1.841336 | 2.718287  | -1.879203 |
| C        | 0.000000  | -4.397995 | 0.833995  | C        | 0.807726  | -4.326512 | 0.999836  |
| C        | 0.902284  | -4.151313 | -0.248587 | C        | 1.608082  | -3.972242 | -0.132133 |
| H        | -1.750850 | -3.719668 | 1.922690  | H        | -0.997173 | -3.949256 | 2.141739  |
| H        | 0.144393  | -5.291758 | 1.460684  | H        | 1.146465  | -5.139709 | 1.660812  |
| H        | 1.718985  | -4.866066 | -0.436451 | H        | 2.542580  | -4.524257 | -0.319747 |
| H        | 1.468204  | -2.904587 | -1.908204 | H        | 1.841336  | -2.718287 | -1.879203 |
| C        | 0.981513  | -0.755423 | -3.436201 | H        | 2.787894  | 2.057110  | 2.408199  |
| H        | 0.452932  | -1.552525 | -3.998119 | H        | 3.748101  | 0.971713  | 1.362654  |
| H        | 1.419636  | -0.046917 | -4.169082 | H        | 3.795173  | 2.748467  | 1.096579  |
| H        | 1.824981  | -1.219981 | -2.894459 | H        | -2.787894 | -2.057110 | 2.408199  |
| C        | -0.981513 | 0.755423  | -3.436201 | H        | -3.748101 | -0.971713 | 1.362654  |
| H        | -0.452932 | 1.552525  | -3.998119 | H        | -3.795173 | -2.748467 | 1.096579  |
| H        | -1.419636 | 0.046917  | -4.169082 | C        | 1.373213  | -0.704857 | -3.859787 |
| H        | -1.824981 | 1.219981  | -2.894459 | H        | 1.020581  | -1.603876 | -4.407770 |
| Cl       | -1.380724 | 1.292374  | 2.182871  | H        | 1.672859  | 0.056292  | -4.611170 |
| Cl       | 1.380724  | -1.292374 | 2.182871  | H        | 2.281955  | -0.983497 | -3.289581 |
|          |           |           |           | C        | -1.373213 | 0.704857  | -3.859787 |
|          |           |           |           | H        | -1.020581 | 1.603876  | -4.407770 |
|          |           |           |           | H        | -1.672859 | -0.056292 | -4.611170 |
|          |           |           |           | H        | -2.281955 | 0.983497  | -3.289581 |
|          |           |           |           | Cl       | -1.579245 | 1.000025  | 2.123433  |
|          |           |           |           | Cl       | 1.579245  | -1.000025 | 2.123433  |

| <b>9</b> |           |           |           | <b>10</b> |           |           |           |
|----------|-----------|-----------|-----------|-----------|-----------|-----------|-----------|
| Zr       | 0.000000  | 0.000000  | 0.339044  | Zr        | 0.000000  | 0.000000  | 0.167862  |
| Si       | 0.000000  | 0.000000  | -2.981118 | Si        | 0.000000  | 0.000000  | -3.211472 |
| C        | 0.308699  | 1.362622  | -1.711321 | C         | -0.437897 | 1.326428  | -1.929800 |
| C        | 1.542262  | 1.507078  | -0.972105 | C         | 0.437897  | -1.326428 | -1.929800 |
| C        | 1.385700  | 2.373211  | 0.155033  | C         | 0.575217  | 2.024567  | -1.173634 |
| C        | 0.000000  | 2.800831  | 0.142942  | C         | 0.000000  | 2.610902  | -0.008219 |
| C        | -0.663572 | 2.166331  | -0.994752 | C         | -1.400141 | 2.321087  | -0.015564 |
| H        | 2.491205  | 1.027868  | -1.249285 | C         | -1.672884 | 1.509222  | -1.190849 |
| C        | 2.528476  | 2.960809  | 0.995972  | H         | 1.640496  | 2.086801  | -1.437610 |
| C        | -0.744199 | 3.703865  | 0.962412  | H         | 0.544320  | 3.195127  | 0.742867  |
| C        | -2.044904 | 2.438584  | -1.254409 | C         | -2.470194 | 2.722681  | 0.876729  |
| C        | -2.080329 | 3.946619  | 0.675598  | C         | -3.023077 | 1.084014  | -1.462531 |
| C        | -2.731118 | 3.317336  | -0.429807 | C         | -0.575217 | -2.024567 | -1.173634 |
| H        | -0.269994 | 4.204166  | 1.818036  | C         | 0.000000  | -2.610902 | -0.008219 |
| H        | -2.652636 | 4.642502  | 1.309035  | C         | 1.400141  | -2.321087 | -0.015564 |
| H        | -3.790194 | 3.542715  | -0.631237 | C         | 1.672884  | -1.509222 | -1.190849 |
| H        | -2.546221 | 1.979118  | -2.118629 | H         | -1.640496 | -2.086801 | -1.437610 |
| C        | 2.243437  | 2.910161  | 2.517917  | H         | -0.544320 | -3.195127 | 0.742867  |
| C        | 3.852624  | 2.212591  | 0.720002  | C         | 2.470194  | -2.722681 | 0.876729  |
| C        | 2.704123  | 4.442446  | 0.556243  | C         | 3.023077  | -1.084014 | -1.462531 |
| H        | 3.081228  | 3.385991  | 3.070155  | C         | -3.802664 | 2.287598  | 0.555060  |
| H        | 1.317283  | 3.450786  | 2.794840  | C         | -4.037117 | 1.471823  | -0.617108 |
| H        | 2.144259  | 1.865139  | 2.869824  | C         | -2.260829 | 3.523424  | 2.026983  |
| H        | 4.662664  | 2.638616  | 1.347876  | C         | -4.874243 | 2.681680  | 1.402742  |
| H        | 3.763675  | 1.134648  | 0.962782  | H         | -5.074048 | 1.164720  | -0.829565 |
| H        | 4.170206  | 2.314712  | -0.338944 | H         | -3.241966 | 0.480922  | -2.355546 |
| H        | 3.547389  | 4.906301  | 1.111223  | C         | 3.802664  | -2.287598 | 0.555060  |
| H        | 2.926615  | 4.514556  | -0.528956 | C         | 4.037117  | -1.471823 | -0.617108 |
| H        | 1.794392  | 5.044807  | 0.754777  | C         | 2.260829  | -3.523424 | 2.026983  |
| C        | -0.308699 | -1.362622 | -1.711321 | C         | 4.874243  | -2.681680 | 1.402742  |
| C        | -1.542262 | -1.507078 | -0.972105 | H         | 5.074048  | -1.164720 | -0.829565 |
| C        | -1.385700 | -2.373211 | 0.155033  | H         | 3.241966  | -0.480922 | -2.355546 |
| C        | 0.000000  | -2.800831 | 0.142942  | C         | -3.331424 | 3.892561  | 2.844038  |
| C        | 0.663572  | -2.166331 | -0.994752 | H         | -1.240517 | 3.850123  | 2.280446  |
| H        | -2.491205 | -1.027868 | -1.249285 | H         | -3.151724 | 4.511272  | 3.737334  |
| C        | -2.528476 | -2.960809 | 0.995972  | C         | -4.645559 | 3.471316  | 2.529408  |
| C        | 0.744199  | -3.703865 | 0.962412  | H         | -5.895708 | 2.348065  | 1.157188  |
| C        | 2.044904  | -2.438584 | -1.254409 | H         | -5.486682 | 3.765022  | 3.177104  |
| C        | 2.080329  | -3.946619 | 0.675598  | C         | 3.331424  | -3.892561 | 2.844038  |
| C        | 2.731118  | -3.317336 | -0.429807 | H         | 1.240517  | -3.850123 | 2.280446  |
| H        | 0.269994  | -4.204166 | 1.818036  | C         | 3.151724  | -4.511272 | 3.737334  |
| H        | 2.652636  | -4.642502 | 1.309035  | H         | 4.645559  | -3.471316 | 2.529408  |
| H        | 3.790194  | -3.542715 | -0.631237 | H         | 5.895708  | -2.348065 | 1.157188  |
| H        | 2.546221  | -1.979118 | -2.118629 | H         | 5.486682  | -3.765022 | 3.177104  |
| C        | -2.243437 | -2.910161 | 2.517917  | C         | -1.441400 | -0.558322 | -4.298426 |
| C        | -3.852624 | -2.212591 | 0.720002  | H         | -1.877236 | 0.300713  | -4.850526 |
| C        | -2.704123 | -4.442446 | 0.556243  | H         | -1.077001 | -1.293927 | -5.046587 |
| H        | -3.081228 | -3.385991 | 3.070155  | H         | -2.253585 | -1.045831 | -3.722672 |
| H        | -1.317283 | -3.450786 | 2.794840  | C         | 1.441400  | 0.558322  | -4.298426 |
| H        | -2.144259 | -1.865139 | 2.869824  | H         | 1.877236  | -0.300713 | -4.850526 |
| H        | -4.662664 | -2.638616 | 1.347876  | H         | 1.077001  | 1.293927  | -5.046587 |
| H        | -3.763675 | -1.134648 | 0.962782  | H         | 2.253585  | 1.045831  | -3.722672 |
| H        | -4.170206 | -2.314712 | -0.338944 | Cl        | -1.813429 | -0.499802 | 1.708099  |
| H        | -3.547389 | -4.906301 | 1.111223  | Cl        | 1.813429  | 0.499802  | 1.708099  |
| H        | -2.926615 | -4.514556 | -0.528956 |           |           |           |           |
| H        | -1.794392 | -5.044807 | 0.754777  |           |           |           |           |
| C        | 1.517105  | -0.264185 | -4.080370 |           |           |           |           |
| H        | 1.460328  | -1.238899 | -4.609070 |           |           |           |           |
| H        | 1.554413  | 0.537589  | -4.848255 |           |           |           |           |
| H        | 2.473136  | -0.230023 | -3.520509 |           |           |           |           |
| C        | -1.517105 | 0.264185  | -4.080370 |           |           |           |           |
| H        | -1.460328 | 1.238899  | -4.609070 |           |           |           |           |
| H        | -1.554413 | -0.537589 | -4.848255 |           |           |           |           |
| H        | -2.473136 | 0.230023  | -3.520509 |           |           |           |           |
| Cl       | -1.773990 | 0.587810  | 1.893715  |           |           |           |           |
| Cl       | 1.773990  | -0.587810 | 1.893715  |           |           |           |           |

| 11 |           |           |           | 12 |           |           |           |
|----|-----------|-----------|-----------|----|-----------|-----------|-----------|
| Zr | 0.000000  | 0.000000  | 0.276348  | Zr | -0.955992 | 0.000000  | -0.070311 |
| Si | 0.000000  | 0.000000  | -3.092071 | Si | 1.298443  | 0.000000  | 2.405168  |
| C  | 0.398509  | 1.351059  | -1.809173 | C  | -0.597056 | 0.000000  | 2.429560  |
| C  | -0.398509 | -1.351059 | -1.809173 | C  | 1.436477  | 0.000000  | 0.518260  |
| C  | 1.616800  | 1.452118  | -1.019045 | C  | -1.409662 | 1.148938  | 2.118717  |
| C  | 1.348435  | 2.239504  | 0.143230  | C  | -2.701411 | 0.709675  | 1.682787  |
| C  | 0.000000  | 2.704658  | 0.091141  | C  | -2.701411 | -0.709675 | 1.682787  |
| C  | -0.595938 | 2.156918  | -1.112386 | C  | -1.409662 | -1.148938 | 2.118717  |
| C  | 2.995696  | 0.938363  | -1.354472 | H  | -1.101630 | 2.200563  | 2.201266  |
| H  | 2.088826  | 2.472924  | 0.918190  | H  | -3.532282 | 1.357323  | 1.377455  |
| C  | -0.738106 | 3.600965  | 0.958170  | H  | -3.532282 | -1.357323 | 1.377455  |
| C  | -1.941077 | 2.539644  | -1.461777 | H  | -1.101630 | -2.200563 | 2.201266  |
| C  | -1.616800 | -1.452118 | -1.019045 | C  | 1.383021  | -1.165977 | -0.366325 |
| C  | -1.348435 | -2.239504 | 0.143230  | C  | 1.235274  | -0.725872 | -1.744427 |
| C  | 0.000000  | -2.704658 | 0.091141  | C  | 1.235274  | 0.725872  | -1.744427 |
| C  | 0.595938  | -2.156918 | -1.112386 | C  | 1.383021  | 1.165977  | -0.366325 |
| C  | -2.995696 | -0.938363 | -1.354472 | C  | 1.443021  | -2.567993 | -0.100690 |
| H  | -2.088826 | -2.472924 | 0.918190  | C  | 1.156713  | -1.666036 | -2.800943 |
| C  | 0.738106  | -3.600965 | 0.958170  | C  | 1.156713  | 1.666036  | -2.800943 |
| C  | 1.941077  | -2.539644 | -1.461777 | C  | 1.443021  | 2.567993  | -0.100690 |
| C  | -2.078628 | 3.946682  | 0.570077  | H  | 1.576110  | -2.936379 | 0.925930  |
| C  | -2.638379 | 3.404209  | -0.647572 | H  | 1.048009  | -1.323956 | -3.841860 |
| C  | -0.196578 | 4.153384  | 2.145943  | H  | 1.048009  | 1.323956  | -3.841860 |
| C  | -2.821139 | 4.839829  | 1.390722  | H  | 1.576110  | 2.936379  | 0.925930  |
| H  | -3.656699 | 3.717522  | -0.929967 | C  | 1.363674  | -3.469872 | -1.159327 |
| H  | -2.388672 | 2.191598  | -2.403174 | C  | 1.215406  | -3.026123 | -2.502831 |
| C  | 2.078628  | -3.946682 | 0.570077  | C  | 1.215406  | 3.026123  | -2.502831 |
| C  | 2.638379  | -3.404209 | -0.647572 | C  | 1.363674  | 3.469872  | -1.159327 |
| C  | 0.196578  | -4.153384 | 2.145943  | H  | 1.419702  | -4.550439 | -0.953105 |
| C  | 2.821139  | -4.839829 | 1.390722  | H  | 1.153351  | -3.768141 | -3.313861 |
| H  | 3.656699  | -3.717522 | -0.929967 | H  | 1.419702  | 4.550439  | -0.953105 |
| H  | 2.388672  | -2.191598 | -2.403174 | H  | 1.153351  | 3.768141  | -3.313861 |
| C  | -0.949824 | 5.024029  | 2.935871  | C  | 2.008023  | 1.540306  | 3.245627  |
| H  | 0.825726  | 3.882456  | 2.451773  | H  | 3.060101  | 1.716487  | 2.938290  |
| H  | -0.516980 | 5.439409  | 3.859601  | H  | 1.995723  | 1.392687  | 4.346338  |
| C  | -2.268687 | 5.371073  | 2.555704  | H  | 1.427958  | 2.459659  | 3.029903  |
| H  | -3.848633 | 5.105088  | 1.092478  | H  | 2.008023  | -1.540306 | 3.245627  |
| H  | -2.858464 | 6.058537  | 3.182459  | H  | 1.995723  | -1.392687 | 4.346338  |
| C  | 0.949824  | -5.024029 | 2.935871  | H  | 3.060101  | -1.716487 | 2.938290  |
| H  | -0.825726 | -3.882456 | 2.451773  | H  | 1.427958  | -2.459659 | 3.029903  |
| H  | 0.516980  | -5.439409 | 3.859601  | Cl | -1.982289 | -1.861782 | -1.248194 |
| C  | 2.268687  | -5.371073 | 2.555704  | Cl | -1.982289 | 1.861782  | -1.248194 |
| H  | 3.848633  | -5.105088 | 1.092478  |    |           |           |           |
| H  | 2.858464  | -6.058537 | 3.182459  |    |           |           |           |
| H  | 3.666471  | 1.035003  | -0.479170 |    |           |           |           |
| H  | 3.010923  | -0.125397 | -1.657960 |    |           |           |           |
| H  | 3.431485  | 1.530779  | -2.188127 |    |           |           |           |
| H  | -3.666471 | -1.035003 | -0.479170 |    |           |           |           |
| H  | -3.010923 | 0.125397  | -1.657960 |    |           |           |           |
| H  | -3.431485 | -1.530779 | -2.188127 |    |           |           |           |
| C  | 1.448154  | -0.395742 | -4.248389 |    |           |           |           |
| H  | 1.234599  | -1.325115 | -4.817887 |    |           |           |           |
| H  | 1.545156  | 0.432239  | -4.982991 |    |           |           |           |
| H  | 2.428563  | -0.511778 | -3.750918 |    |           |           |           |
| C  | -1.448154 | 0.395742  | -4.248389 |    |           |           |           |
| H  | -1.234599 | 1.325115  | -4.817887 |    |           |           |           |
| H  | -1.545156 | -0.432239 | -4.982991 |    |           |           |           |
| H  | -2.428563 | 0.511778  | -3.750918 |    |           |           |           |
| Cl | -1.805100 | 0.528198  | 1.823234  |    |           |           |           |
| Cl | 1.805100  | -0.528198 | 1.823234  |    |           |           |           |

| 13 |           |           |           | 14 |           |           |           |
|----|-----------|-----------|-----------|----|-----------|-----------|-----------|
| Zr | 0.905805  | 0.000000  | 0.191134  | Zr | 0.888445  | -0.481514 | 0.000000  |
| C  | -1.744803 | 0.000000  | 1.925392  | C  | -1.809821 | -2.129854 | 0.000000  |
| C  | -0.270120 | 0.000000  | 2.370219  | C  | -0.351331 | -2.624726 | 0.000000  |
| C  | -1.544840 | 0.000000  | 0.380833  | C  | -1.560964 | -0.599639 | 0.000000  |
| C  | 0.592869  | 1.150921  | 2.378338  | C  | 0.510696  | -2.657633 | 1.151142  |
| C  | 1.955717  | 0.708477  | 2.429743  | C  | 1.871809  | -2.745598 | 0.708711  |
| C  | 1.955717  | -0.708477 | 2.429743  | C  | 1.871809  | -2.745598 | -0.708711 |
| C  | 0.592869  | -1.150921 | 2.378338  | C  | 0.510696  | -2.657633 | -1.151142 |
| H  | 0.278803  | 2.201306  | 2.334814  | H  | 0.195985  | -2.607278 | 2.200984  |
| H  | 2.838711  | 1.358650  | 2.443064  | H  | 2.754292  | -2.783783 | 1.358649  |
| H  | 2.838711  | -1.358650 | 2.443064  | H  | 2.754292  | -2.783783 | -1.358649 |
| H  | 0.278803  | -2.201306 | 2.334814  | H  | 0.195985  | -2.607278 | -2.200984 |
| C  | -1.322095 | -1.172645 | -0.471355 | C  | -1.316976 | 0.248488  | -1.186662 |
| C  | -0.893627 | -0.723408 | -1.790574 | C  | -0.862210 | 1.530590  | -0.701914 |
| C  | -0.893627 | 0.723408  | -1.790574 | C  | -0.862210 | 1.530590  | 0.701914  |
| C  | -1.322095 | 1.172645  | -0.471355 | C  | -1.316976 | 0.248488  | 1.186662  |
| C  | -1.426200 | -2.587566 | -0.263488 | C  | -1.376556 | 0.146428  | -2.609847 |
| C  | -0.588920 | -1.643677 | -2.824787 | C  | -0.498269 | 2.667113  | -1.470984 |
| C  | -0.588920 | 1.643677  | -2.824787 | C  | -0.498269 | 2.667113  | 1.470984  |
| C  | -1.426200 | 2.587566  | -0.263488 | C  | -1.376556 | 0.146428  | 2.609847  |
| H  | -1.768792 | -2.997339 | 0.693266  | H  | -1.716964 | -0.765127 | -3.117909 |
| H  | -0.266529 | -1.274782 | -3.810686 | H  | -1.716964 | -0.765127 | 3.117909  |
| H  | -0.266529 | 1.274782  | -3.810686 | C  | -1.011610 | 1.258824  | -3.397000 |
| H  | -1.768792 | 2.997339  | 0.693266  | C  | -0.576390 | 2.498768  | -2.871907 |
| C  | -1.125549 | -3.467233 | -1.299688 | C  | -0.576390 | 2.498768  | 2.871907  |
| C  | -0.700619 | -3.007597 | -2.576459 | C  | -1.011610 | 1.258824  | 3.397000  |
| C  | -0.700619 | 3.007597  | -2.576459 | H  | -1.070986 | 1.150631  | -4.491925 |
| C  | -1.125549 | 3.467233  | -1.299688 | H  | -0.309034 | 3.320219  | -3.554872 |
| H  | -1.221958 | -4.550262 | -1.123159 | H  | -1.070986 | 1.150631  | 4.491925  |
| H  | -0.466448 | -3.735286 | -3.368418 | H  | -0.309034 | 3.320219  | 3.554872  |
| H  | -1.221958 | 4.550262  | -1.123159 | C  | -2.584658 | -2.617402 | 1.241336  |
| H  | -0.466448 | 3.735286  | -3.368418 | H  | -3.570188 | -2.112556 | 1.305508  |
| C  | -2.505356 | 1.235500  | 2.456884  | H  | -2.757352 | -3.710973 | 1.169275  |
| H  | -3.484162 | 1.342259  | 1.946409  | H  | -2.048002 | -2.436105 | 2.189676  |
| H  | -2.692636 | 1.113395  | 3.543257  | C  | -2.584658 | -2.617402 | -1.241336 |
| H  | -1.950155 | 2.181920  | 2.337092  | H  | -2.757352 | -3.710973 | -1.169275 |
| C  | -2.505356 | -1.235500 | 2.456884  | H  | -3.570188 | -2.112556 | -1.305508 |
| H  | -2.692636 | -1.113395 | 3.543257  | H  | -2.048002 | -2.436105 | -2.189676 |
| H  | -3.484162 | -1.342259 | 1.946409  | C  | -0.110060 | 3.828130  | -0.695410 |
| H  | -1.950155 | -2.181920 | 2.337092  | C  | -0.110060 | 3.828130  | 0.695410  |
| Cl | 2.198767  | -1.877471 | -0.651726 | H  | 0.196666  | 4.741442  | -1.230676 |
| Cl | 2.198767  | 1.877471  | -0.651726 | H  | 0.196666  | 4.741442  | 1.230676  |
| XX | 2.198767  | 0.000000  | -0.651726 | Cl | 2.202846  | 0.350013  | -1.867225 |
|    |           |           |           | Cl | 2.202846  | 0.350013  | 1.867225  |



| <b>15</b> |           |           |           | <b>16</b> |           |           |           |
|-----------|-----------|-----------|-----------|-----------|-----------|-----------|-----------|
| Zr        | 0.000000  | 0.000000  | 1.080931  | Zr        | 0.000000  | 0.000000  | 0.997678  |
| N         | 1.320295  | 0.697349  | -0.953414 | N         | 1.316273  | 0.699012  | -1.039251 |
| C         | 1.828030  | 2.103816  | -0.757232 | C         | 1.821268  | 2.106465  | -0.843138 |
| C         | 0.771380  | 3.185913  | -0.754989 | C         | 0.765466  | 3.189899  | -0.837324 |
| C         | -0.402575 | 3.036067  | 0.040312  | C         | -0.394874 | 3.047654  | -0.026083 |
| C         | -1.360834 | 4.076978  | 0.082061  | C         | -1.358982 | 4.092793  | 0.062111  |
| C         | -1.154317 | 5.256357  | -0.649474 | C         | -1.135125 | 5.265269  | -0.685185 |
| C         | 0.000000  | 5.412386  | -1.438817 | C         | 0.000000  | 5.413999  | -1.502287 |
| C         | 0.947645  | 4.375425  | -1.488961 | C         | 0.942745  | 4.376412  | -1.576383 |
| O         | -0.592479 | 1.905558  | 0.730833  | O         | -0.580237 | 1.911336  | 0.661487  |
| C         | 0.439262  | 0.622392  | -2.150975 | C         | 0.436424  | 0.624044  | -2.237241 |
| C         | 2.494924  | -0.198421 | -1.095923 | C         | 2.491116  | -0.195149 | -1.184354 |
| H         | 1.050297  | 0.644148  | -3.085278 | H         | 1.047798  | 0.650042  | -3.171187 |
| H         | -0.185159 | 1.538382  | -2.163498 | H         | -0.190634 | 1.538426  | -2.247094 |
| H         | 3.120802  | 0.110146  | -1.966388 | H         | 3.117185  | 0.115944  | -2.053848 |
| H         | 2.172704  | -1.246845 | -1.232960 | H         | 2.167599  | -1.242641 | -1.326615 |
| H         | 3.105870  | -0.147859 | -0.174280 | H         | 3.102270  | -0.146866 | -0.262797 |
| H         | 2.376033  | 2.094496  | 0.209818  | H         | 2.371907  | 2.097472  | 0.122440  |
| H         | 2.572603  | 2.326357  | -1.557884 | H         | 2.563628  | 2.329727  | -1.645568 |
| H         | 1.853639  | 4.491176  | -2.107941 | H         | 1.838793  | 4.487320  | -2.210037 |
| H         | -2.253979 | 3.936953  | 0.709976  | C         | -2.556227 | 3.921555  | 0.963176  |
| H         | -1.903884 | 6.062633  | -0.602418 | H         | -1.872988 | 6.082374  | -0.620946 |
| H         | 0.161607  | 6.336333  | -2.014986 | H         | 0.149467  | 6.339742  | -2.079128 |
| N         | -1.320295 | -0.697349 | -0.953414 | N         | -1.316273 | -0.699012 | -1.039251 |
| C         | -1.828030 | -2.103816 | -0.757232 | C         | -1.821268 | -2.106465 | -0.843138 |
| C         | -0.771380 | -3.185913 | -0.754989 | C         | -0.765466 | -3.189899 | -0.837324 |
| C         | 0.402575  | -3.036067 | 0.040312  | C         | 0.394874  | -3.047654 | -0.026083 |
| C         | 1.360834  | -4.076978 | 0.082061  | C         | 1.358982  | -4.092793 | 0.062111  |
| C         | 1.154317  | -5.256357 | -0.649474 | C         | 1.135125  | -5.265269 | -0.685185 |
| C         | 0.000000  | -5.412386 | -1.438817 | C         | 0.000000  | -5.413999 | -1.502287 |
| C         | -0.947645 | -4.375425 | -1.488961 | C         | -0.942745 | -4.376412 | -1.576383 |
| O         | 0.592479  | -1.905558 | 0.730833  | O         | 0.580237  | -1.911336 | 0.661487  |
| C         | -0.439262 | -0.622392 | -2.150975 | C         | -0.436424 | -0.624044 | -2.237241 |
| C         | -2.494924 | 0.198421  | -1.095923 | C         | -2.491116 | 0.195149  | -1.184354 |
| H         | -1.050297 | -0.644148 | -3.085278 | H         | -1.047798 | -0.650042 | -3.171187 |
| H         | 0.185159  | -1.538382 | -2.163498 | H         | 0.190634  | -1.538426 | -2.247094 |
| H         | -3.120802 | -0.110146 | -1.966388 | H         | -3.117185 | -0.115944 | -2.053848 |
| H         | -2.172704 | 1.246845  | -1.232960 | H         | -2.167599 | 1.242641  | -1.326615 |
| H         | -3.105870 | 0.147859  | -0.174280 | H         | -3.102270 | 0.146866  | -0.262797 |
| H         | -2.376033 | -2.094496 | 0.209818  | H         | -2.371907 | -2.097472 | 0.122440  |
| H         | -2.572603 | -2.326357 | -1.557884 | H         | -2.563628 | -2.329727 | -1.645568 |
| H         | -1.853639 | -4.491176 | -2.107941 | H         | -1.838793 | -4.487320 | -2.210037 |
| H         | 2.253979  | -3.936953 | 0.709976  | C         | 2.556227  | -3.921555 | 0.963176  |
| H         | 1.903884  | -6.062633 | -0.602418 | H         | 1.872988  | -6.082374 | -0.620946 |
| H         | -0.161607 | -6.336333 | -2.014986 | H         | -0.149467 | -6.339742 | -2.079128 |
| Cl        | 1.898615  | 0.556440  | 2.498732  | H         | -3.214341 | 4.812054  | 0.932626  |
| Cl        | -1.898615 | -0.556440 | 2.498732  | H         | -3.158308 | 3.031389  | 0.682246  |
|           |           |           |           | H         | -2.242032 | 3.752288  | 2.015149  |
|           |           |           |           | H         | 3.214341  | -4.812054 | 0.932626  |
|           |           |           |           | H         | 3.158308  | -3.031389 | 0.682246  |
|           |           |           |           | H         | 2.242032  | -3.752288 | 2.015149  |
|           |           |           |           | Cl        | 1.903756  | 0.546534  | 2.417312  |
|           |           |           |           | Cl        | -1.903756 | -0.546534 | 2.417312  |

| 17 |           |           |           | 18 |           |           |           |
|----|-----------|-----------|-----------|----|-----------|-----------|-----------|
| Zr | 0.000000  | 0.000000  | 0.662262  | Zr | 0.000000  | 0.000000  | 0.079476  |
| N  | 1.446006  | 0.301700  | -1.363091 | N  | 1.474458  | -0.039697 | -1.942127 |
| C  | 2.324242  | 1.508837  | -1.161055 | C  | 2.602927  | 0.935130  | -1.729605 |
| C  | 1.632829  | 2.854524  | -1.133790 | C  | 2.240586  | 2.403810  | -1.698860 |
| C  | 0.531415  | 3.079985  | -0.254110 | C  | 1.209663  | 2.882039  | -0.833707 |
| C  | 0.000000  | 4.398423  | -0.067928 | C  | 1.000804  | 4.290768  | -0.654478 |
| C  | 0.559723  | 5.425352  | -0.859875 | C  | 1.804776  | 5.153934  | -1.432987 |
| C  | 1.602315  | 5.201846  | -1.774686 | C  | 2.781819  | 4.690863  | -2.329044 |
| C  | 2.146987  | 3.917618  | -1.899041 | C  | 3.005955  | 3.314531  | -2.450741 |
| O  | 0.029334  | 2.013380  | 0.392770  | O  | 0.462847  | 1.961702  | -0.194336 |
| C  | 0.587941  | 0.482321  | -2.564254 | C  | 0.684520  | 0.332503  | -3.145809 |
| C  | 2.326533  | -0.882309 | -1.518511 | C  | 2.065899  | -1.391536 | -2.096944 |
| H  | 1.188753  | 0.346797  | -3.495342 | H  | 1.238741  | 0.057563  | -4.074960 |
| H  | 0.234990  | 1.533890  | -2.566795 | H  | 0.586124  | 1.437235  | -3.152372 |
| H  | 2.995754  | -0.759582 | -2.402566 | H  | 2.758238  | -1.416848 | -2.971198 |
| H  | 1.727383  | -1.802958 | -1.640708 | H  | 1.276422  | -2.152612 | -2.234715 |
| H  | 2.947243  | -0.997742 | -0.610197 | H  | 2.631382  | -1.648034 | -1.181401 |
| H  | 2.859867  | 1.335318  | -0.202641 | H  | 3.081238  | 0.639009  | -0.770999 |
| H  | 3.091480  | 1.519469  | -1.970743 | H  | 3.356921  | 0.774344  | -2.535982 |
| H  | 2.991397  | 3.732124  | -2.584041 | H  | 3.793693  | 2.933081  | -3.122018 |
| C  | -1.085189 | 4.703924  | 0.993021  | C  | 0.000000  | 4.856913  | 0.372751  |
| H  | 0.171578  | 6.448134  | -0.757601 | H  | 1.669138  | 6.239335  | -1.335802 |
| H  | 1.998564  | 6.036438  | -2.373561 | H  | 3.376047  | 5.407896  | -2.916393 |
| N  | -1.446006 | -0.301700 | -1.363091 | N  | -1.474458 | 0.039697  | -1.942127 |
| C  | -2.324242 | -1.508837 | -1.161055 | C  | -2.602927 | -0.935130 | -1.729605 |
| C  | -1.632829 | -2.854524 | -1.133790 | C  | -2.240586 | -2.403810 | -1.698860 |
| C  | -0.531415 | -3.079985 | -0.254110 | C  | -1.209663 | -2.882039 | -0.833707 |
| C  | 0.000000  | -4.398423 | -0.067928 | C  | -1.000804 | -4.290768 | -0.654478 |
| C  | -0.559723 | -5.425352 | -0.859875 | C  | -1.804776 | -5.153934 | -1.432987 |
| C  | -1.602315 | -5.201846 | -1.774686 | C  | -2.781819 | -4.690863 | -2.329044 |
| C  | -2.146987 | -3.917618 | -1.899041 | C  | -3.005955 | -3.314531 | -2.450741 |
| O  | -0.029334 | -2.013380 | 0.392770  | O  | -0.462847 | -1.961702 | -0.194336 |
| C  | -0.587941 | -0.482321 | -2.564254 | C  | -0.684520 | -0.332503 | -3.145809 |
| C  | -2.326533 | 0.882309  | -1.518511 | C  | -2.065899 | 1.391536  | -2.096944 |
| H  | -1.188753 | -0.346797 | -3.495342 | H  | -1.238741 | -0.057563 | -4.074960 |
| H  | -0.234990 | -1.533890 | -2.566795 | H  | -0.586124 | -1.437235 | -3.152372 |
| H  | -2.995754 | 0.759582  | -2.402566 | H  | -2.758238 | 1.416848  | -2.971198 |
| H  | -1.727383 | 1.802958  | -1.640708 | H  | -1.276422 | 2.152612  | -2.234715 |
| H  | -2.947243 | 0.997742  | -0.610197 | H  | -2.631382 | 1.648034  | -1.181401 |
| H  | -2.859867 | -1.335318 | -0.202641 | H  | -3.081238 | 0.639009  | -0.770999 |
| H  | -3.091480 | -1.519469 | -1.970743 | H  | -3.356921 | -0.774344 | -2.535982 |
| H  | -2.991397 | -3.732124 | -2.584041 | H  | -3.793693 | -2.933081 | -3.122018 |
| C  | 1.085189  | -4.703924 | 0.993021  | C  | 0.000000  | -4.856913 | 0.372751  |
| H  | -0.171578 | -6.448134 | -0.757601 | H  | -1.669138 | -6.239335 | -1.335802 |
| H  | -1.998564 | -6.036438 | -2.373561 | H  | -3.376047 | -5.407896 | -2.916393 |
| C  | -1.441113 | 6.207479  | 1.031311  | C  | 0.011518  | 6.413553  | 0.403747  |
| C  | -2.389329 | 3.922122  | 0.692795  | C  | -1.461282 | 4.411789  | 0.054759  |
| C  | -0.550093 | 4.306044  | 2.395415  | C  | 0.366112  | 4.360364  | 1.809292  |
| H  | -2.202865 | 6.382673  | 1.818908  | C  | -0.979766 | 6.969489  | 1.450922  |
| H  | -0.563731 | 6.842306  | 1.274282  | H  | 1.035340  | 6.780173  | 0.639046  |
| H  | -1.871172 | 6.562303  | 0.070920  | H  | -0.252485 | 6.815710  | -0.600135 |
| H  | -3.174301 | 4.197700  | 1.428876  | C  | -2.452508 | 4.963136  | 1.105719  |
| H  | -2.775775 | 4.165842  | -0.319957 | H  | -1.739278 | 4.771015  | -0.962356 |
| H  | -2.231167 | 2.830836  | 0.767057  | H  | -1.511420 | 3.306424  | 0.047088  |
| H  | -1.314218 | 4.525783  | 3.171231  | C  | -0.632531 | 4.910856  | 2.853743  |
| H  | -0.310210 | 3.226938  | 2.448903  | H  | 0.365002  | 3.252075  | 1.832645  |
| H  | 0.366246  | 4.880209  | 2.646730  | H  | 1.399988  | 4.691252  | 2.054128  |
| C  | 1.441113  | -6.207479 | 1.031311  | C  | -0.011518 | -6.413553 | 0.403747  |
| C  | 2.389329  | -3.922122 | 0.692795  | C  | 1.461282  | -4.411789 | 0.054759  |
| C  | 0.550093  | -4.306044 | 2.395415  | C  | -0.366112 | -4.360364 | 1.809292  |
| H  | 2.202865  | -6.382673 | 1.818908  | C  | 0.979766  | -6.969489 | 1.450922  |
| H  | 0.563731  | -6.842306 | 1.274282  | H  | -1.035340 | -6.780173 | 0.639046  |
| H  | 1.871172  | -6.562303 | 0.070920  | H  | 0.252485  | -6.815710 | -0.600135 |
| H  | 3.174301  | -4.197700 | 1.428876  | C  | 2.452508  | -4.963136 | 1.105719  |
| H  | 2.775775  | -4.165842 | -0.319957 | H  | 1.739278  | -4.771015 | -0.962356 |
| H  | 2.231167  | -2.830836 | 0.767057  | H  | 1.511420  | -3.306424 | 0.047088  |
| H  | 1.314218  | -4.525783 | 3.171231  | C  | 0.632531  | -4.910856 | 2.853743  |
| H  | 0.310210  | -3.226938 | 2.448903  | H  | -0.365002 | -3.252075 | 1.832645  |
| H  | -0.366246 | -4.880209 | 2.646730  | H  | -1.399988 | -4.691252 | 2.054128  |
| Cl | 1.993993  | -0.058658 | 2.069160  | H  | -0.931089 | 8.081017  | 1.432609  |
| Cl | -1.993993 | 0.058658  | 2.069160  | C  | -2.411371 | 6.505475  | 1.104744  |
|    |           |           |           | C  | -0.590708 | 6.453970  | 2.853634  |
|    |           |           |           | H  | -3.477752 | 4.613692  | 0.849886  |
|    |           |           |           | C  | -2.060780 | 4.434057  | 2.504466  |
|    |           |           |           | H  | -0.347154 | 4.526461  | 3.857876  |
|    |           |           |           | H  | 0.931089  | -8.081017 | 1.432609  |
|    |           |           |           | C  | 2.411371  | -6.505475 | 1.104744  |
|    |           |           |           | C  | 0.590708  | -6.453970 | 2.853634  |
|    |           |           |           | H  | 3.477752  | -4.613692 | 0.849886  |
|    |           |           |           | C  | 2.060780  | -4.434057 | 2.504466  |
|    |           |           |           | H  | 0.347154  | -4.526461 | 3.857876  |
|    |           |           |           | H  | -2.711814 | 6.899632  | 0.107757  |
|    |           |           |           | H  | -3.136883 | 6.913079  | 1.843689  |
|    |           |           |           | H  | 0.427856  | 6.812142  | 3.123896  |
|    |           |           |           | H  | -1.288807 | 6.860805  | 3.618973  |
|    |           |           |           | H  | -2.107678 | 3.323992  | 2.518116  |
|    |           |           |           | H  | -2.783657 | 4.801147  | 3.266968  |
|    |           |           |           | H  | 2.711814  | -6.899632 | 0.107757  |
|    |           |           |           | H  | 3.136883  | -6.913079 | 1.843689  |
|    |           |           |           | H  | -0.427856 | -6.812142 | 3.123896  |
|    |           |           |           | H  | 1.288807  | -6.860805 | 3.618973  |
|    |           |           |           | H  | 2.107678  | -3.323992 | 2.518116  |
|    |           |           |           | H  | 2.783657  | -4.801147 | 3.266968  |
|    |           |           |           | Cl | 1.932261  | -0.483410 | 1.492712  |
|    |           |           |           | Cl | -1.932261 | 0.483410  | 1.492712  |

| 19 |           |           |           | 20 |             |             |             |
|----|-----------|-----------|-----------|----|-------------|-------------|-------------|
| Zr | 0.000000  | 0.000000  | 1.443195  | Zr | 0.00000000  | 0.00000000  | 1.42827090  |
| N  | -0.771284 | 1.627800  | -0.212030 | N  | -1.55925290 | 0.83973314  | -0.25161510 |
| C  | -2.022067 | 1.802386  | -0.587618 | C  | -2.66934372 | 0.23909059  | -0.63271510 |
| C  | -3.155307 | 0.964780  | -0.294643 | C  | -3.10515821 | -1.09640582 | -0.32190010 |
| C  | -3.050782 | -0.243278 | 0.478255  | C  | -2.32844519 | -1.99848161 | 0.47972590  |
| C  | -4.214569 | -1.025179 | 0.693942  | C  | -2.80300784 | -3.32027448 | 0.73994890  |
| C  | -5.445455 | -0.617978 | 0.171337  | C  | -4.03818191 | -3.69904719 | 0.19246090  |
| C  | -5.561514 | 0.572105  | -0.586408 | C  | -4.81623597 | -2.82253604 | -0.60078310 |
| C  | -4.426011 | 1.346101  | -0.814485 | C  | -4.35196714 | -1.53593146 | -0.85486110 |
| O  | -1.892243 | -0.620897 | 0.984167  | O  | -1.16967943 | -1.61630069 | 0.98698590  |
| C  | 0.133725  | 2.661130  | -0.583393 | C  | -1.42178449 | 2.19470627  | -0.66537510 |
| H  | -2.250779 | 2.688887  | -1.215858 | H  | -3.36303979 | 0.81051712  | -1.28467510 |
| H  | -4.496875 | 2.274626  | -1.404929 | H  | -4.94273788 | -0.83758837 | -1.47019710 |
| H  | -4.116182 | -1.942926 | 1.292462  | C  | -1.97419965 | -4.23683257 | 1.60204390  |
| H  | -6.339673 | -1.234652 | 0.356784  | H  | -4.41150841 | -4.71707869 | 0.39345590  |
| H  | -6.537214 | 0.880565  | -0.990421 | H  | -5.77994469 | -3.15989643 | -1.01081310 |
| N  | 0.771284  | -1.627800 | -0.212030 | N  | 1.55925290  | -0.83973314 | -0.25161510 |
| C  | 2.022067  | -1.802386 | -0.587618 | C  | 2.66934372  | -0.23909059 | -0.63271510 |
| C  | 3.155307  | -0.964780 | -0.294643 | C  | 3.10515821  | 1.09640582  | -0.32190010 |
| C  | 3.050782  | 0.243278  | 0.478255  | C  | 2.32844519  | 1.99848161  | 0.47972590  |
| C  | 4.214569  | 1.025179  | 0.693942  | C  | 2.80300784  | 3.32027448  | 0.73994890  |
| C  | 5.445455  | 0.617978  | 0.171337  | C  | 4.03818191  | 3.69904719  | 0.19246090  |
| C  | 5.561514  | -0.572105 | -0.586408 | C  | 4.81623597  | 2.82253604  | -0.60078310 |
| C  | 4.426011  | -1.346101 | -0.814485 | C  | 4.35196714  | 1.53593146  | -0.85486110 |
| O  | 1.892243  | 0.620897  | 0.984167  | O  | 1.16967943  | 1.61630069  | 0.98698590  |
| C  | -0.133725 | -2.661130 | -0.583393 | C  | 1.42178449  | -2.19470627 | -0.66537510 |
| H  | 2.250779  | -2.688887 | -1.215858 | H  | 3.36303979  | -0.81051712 | -1.28467510 |
| H  | 4.496875  | -2.274626 | -1.404929 | H  | 4.94273788  | 0.83758837  | -1.47019710 |
| H  | 4.116182  | 1.942926  | 1.292462  | C  | 1.97419965  | 4.23683257  | 1.60204390  |
| H  | 6.339673  | 1.234652  | 0.356784  | H  | 4.41150841  | 4.71707869  | 0.39345590  |
| H  | 6.537214  | -0.880565 | -0.990421 | H  | 5.77994469  | 3.15989643  | -1.01081310 |
| C  | 1.231401  | 2.387617  | -1.426845 | C  | -0.38459415 | 2.57821649  | -1.54216810 |
| C  | 2.182332  | 3.372252  | -1.740672 | C  | -0.19237488 | 3.91901378  | -1.91448110 |
| C  | 2.040713  | 4.670714  | -1.215016 | C  | -1.05506787 | 4.91262248  | -1.41331710 |
| C  | 0.948416  | 4.972288  | -0.381465 | C  | -2.10286599 | 4.55477281  | -0.54514810 |
| C  | 0.000000  | 3.976820  | -0.082166 | C  | -2.28813392 | 3.20568975  | -0.18902710 |
| F  | 1.374261  | 1.162064  | -1.955160 | F  | 0.43747897  | 1.64586956  | -2.04784510 |
| F  | 3.210022  | 3.087243  | -2.548938 | F  | 0.79417136  | 4.25314205  | -2.75456810 |
| F  | 2.939575  | 5.614477  | -1.510829 | F  | -0.88287036 | 6.18986397  | -1.76702410 |
| F  | 0.810143  | 6.205894  | 0.116390  | F  | -2.92716724 | 5.49549327  | -0.07132610 |
| F  | -1.034798 | 4.293295  | 0.706617  | F  | -3.30127598 | 2.89174702  | 0.62780690  |
| C  | -1.231401 | -2.387617 | -1.426845 | C  | 0.38459415  | -2.57821649 | -1.54216810 |
| C  | -2.182332 | -3.372252 | -1.740672 | C  | 0.19237488  | -3.91901378 | -1.91448110 |
| C  | -2.040713 | -4.670714 | -1.215016 | C  | 1.05506787  | -4.91262248 | -1.41331710 |
| C  | -0.948416 | -4.972288 | -0.381465 | C  | 2.10286599  | -4.55477281 | -0.54514810 |
| C  | 0.000000  | -3.976820 | -0.082166 | C  | 2.28813392  | -3.20568975 | -0.18902710 |
| F  | -1.374261 | -1.162064 | -1.955160 | F  | -0.43747897 | -1.64586956 | -2.04784510 |
| F  | -3.210022 | -3.087243 | -2.548938 | F  | -0.79417136 | -4.25314205 | -2.75456810 |
| F  | -2.939575 | -5.614477 | -1.510829 | F  | 0.88287036  | -6.18986397 | -1.76702410 |
| F  | -0.810143 | -6.205894 | 0.116390  | F  | 2.92716724  | -5.49549327 | -0.07132610 |
| F  | 1.034798  | -4.293295 | 0.706617  | F  | 3.30127598  | -2.89174702 | 0.62780690  |
| Cl | -0.534576 | 1.741091  | 3.038311  | H  | -2.40939571 | -5.25389986 | 1.64656090  |
| Cl | 0.534576  | -1.741091 | 3.038311  | H  | -0.93315763 | -4.30900507 | 1.22355390  |
|    |           |           |           | H  | -1.89322938 | -3.84281140 | 2.63780490  |
|    |           |           |           | H  | 2.40939571  | 5.25389986  | 1.64656090  |
|    |           |           |           | H  | 0.93315763  | 4.30900507  | 1.22355390  |
|    |           |           |           | H  | 1.89322938  | 3.84281140  | 2.63780490  |
|    |           |           |           | Cl | -1.45646425 | 1.10944508  | 3.01614690  |
|    |           |           |           | Cl | 1.45646425  | -1.10944508 | 3.01614690  |

| 21 |           |           |           | 22 |           |           |           |
|----|-----------|-----------|-----------|----|-----------|-----------|-----------|
| Zr | 0.000000  | 0.000000  | 1.124889  | Zr | 0.000000  | 0.000000  | 0.991169  |
| N  | 1.593284  | 0.638031  | -0.585598 | N  | -0.332627 | 1.708217  | -0.712949 |
| C  | 1.829804  | 1.870060  | -0.995956 | C  | -1.501909 | 2.164825  | -1.122166 |
| C  | 1.148675  | 3.086911  | -0.645699 | C  | -2.817341 | 1.706571  | -0.770055 |
| C  | 0.057224  | 3.129386  | 0.292250  | C  | -3.054883 | 0.628841  | 0.153054  |
| C  | -0.518078 | 4.389697  | 0.675816  | C  | -4.386609 | 0.286354  | 0.541707  |
| C  | 0.000000  | 5.537473  | 0.048167  | C  | -5.439377 | 0.999798  | -0.063852 |
| C  | 1.045266  | 5.506097  | -0.903987 | C  | -5.229515 | 2.031060  | -1.010576 |
| C  | 1.624038  | 4.290143  | -1.239974 | C  | -3.928177 | 2.386904  | -1.347142 |
| O  | -0.378740 | 1.986997  | 0.795413  | O  | -2.021796 | -0.031703 | 0.652544  |
| C  | 2.552256  | -0.328531 | -1.002785 | C  | 0.787624  | 2.483185  | -1.125551 |
| H  | 2.674849  | 2.011004  | -1.702206 | H  | -1.491130 | 3.024771  | -1.824436 |
| H  | 2.457931  | 4.239339  | -1.959082 | H  | -3.736692 | 3.207084  | -2.058917 |
| C  | -1.624829 | 4.483884  | 1.751730  | H  | -6.477753 | 0.754919  | 0.214472  |
| H  | -0.421414 | 6.517901  | 0.311165  | H  | -6.087131 | 2.555611  | -1.458288 |
| H  | 1.401015  | 6.443053  | -1.358235 | N  | 0.332627  | -1.708217 | -0.712949 |
| N  | -1.593284 | -0.638031 | -0.585598 | C  | 1.501909  | -2.164825 | -1.122166 |
| C  | -1.829804 | -1.870060 | -0.995956 | C  | 2.817341  | -1.706571 | -0.770055 |
| C  | -1.148675 | -3.086911 | -0.645699 | C  | 3.054883  | -0.628841 | 0.153054  |
| C  | -0.057224 | -3.129386 | 0.292250  | C  | 4.386609  | -0.286354 | 0.541707  |
| C  | 0.518078  | -4.389697 | 0.675816  | C  | 5.439377  | -0.999798 | -0.063852 |
| C  | 0.000000  | -5.537473 | 0.048167  | C  | 5.229515  | -2.031060 | -1.010576 |
| C  | -1.045266 | -5.506097 | -0.903987 | C  | 3.928177  | -2.386904 | -1.347142 |
| C  | -1.624038 | -4.290143 | -1.239974 | O  | 2.021796  | 0.031703  | 0.652544  |
| O  | 0.378740  | -1.986997 | 0.795413  | C  | -0.787624 | -2.483185 | -1.125551 |
| C  | -2.552256 | 0.328531  | -1.002785 | H  | 1.491130  | -3.024771 | -1.824436 |
| H  | -2.674849 | -2.011004 | -1.702206 | H  | 3.736692  | -3.207084 | -2.058917 |
| H  | -2.457931 | -4.239339 | -1.959082 | H  | 6.477753  | -0.754919 | 0.214472  |
| C  | 1.624829  | -4.483884 | 1.751730  | H  | 6.087131  | -2.555611 | -1.458288 |
| H  | 0.421414  | -6.517901 | 0.311165  | C  | 1.798021  | 1.932713  | -1.941789 |
| H  | -1.401015 | -6.443053 | -1.358235 | C  | 2.934904  | 2.672280  | -2.306458 |
| C  | 2.197127  | -1.390099 | -1.861297 | C  | 3.072418  | 4.001710  | -1.867019 |
| C  | 3.119699  | -2.385648 | -2.222036 | C  | 2.069910  | 4.583170  | -1.070691 |
| C  | 4.439355  | -2.322115 | -1.738144 | C  | 0.938354  | 3.828654  | -0.712781 |
| C  | 4.825322  | -1.263849 | -0.896127 | F  | 1.671977  | 0.678339  | -2.402478 |
| C  | 3.890213  | -0.272901 | -0.545849 | F  | 3.883207  | 2.120976  | -3.072739 |
| F  | 0.952239  | -1.456465 | -2.358657 | F  | 4.163115  | 4.703040  | -2.190691 |
| F  | 2.750148  | -3.391025 | -3.024043 | F  | 2.201282  | 5.844445  | -0.646858 |
| F  | 5.316716  | -3.276458 | -2.062484 | F  | 0.000000  | 4.404052  | 0.051010  |
| F  | 6.077827  | -1.202813 | -0.431672 | C  | -1.798021 | -1.932713 | -1.941789 |
| F  | 4.284523  | 0.727811  | 0.251423  | C  | -2.934904 | -2.672280 | -2.306458 |
| C  | -2.197127 | 1.390099  | -1.861297 | C  | -3.072418 | -4.001710 | -1.867019 |
| C  | -3.119699 | 2.385648  | -2.222036 | C  | -2.069910 | -4.583170 | -1.070691 |
| C  | -4.439355 | 2.322115  | -1.738144 | C  | -0.938354 | -3.828654 | -0.712781 |
| C  | -4.825322 | 1.263849  | -0.896127 | F  | -1.671977 | -0.678339 | -2.402478 |
| C  | -3.890213 | 0.272901  | -0.545849 | F  | -3.883207 | -2.120976 | -3.072739 |
| F  | -0.952239 | 1.456465  | -2.358657 | F  | 4.163115  | -4.703040 | -2.190691 |
| F  | -2.750148 | 3.391025  | -3.024043 | F  | -2.201282 | -5.844445 | -0.646858 |
| F  | -5.316716 | 3.276458  | -2.062484 | F  | 0.000000  | -4.404052 | 0.051010  |
| F  | -6.077827 | 1.202813  | -0.431672 | C  | -6.605069 | -1.105066 | 2.170199  |
| F  | -4.284523 | -0.727811 | 0.251423  | C  | -4.086050 | -2.718081 | 1.408064  |
| C  | -2.061528 | 5.946002  | 1.996185  | C  | -3.906241 | -0.442648 | 3.528232  |
| C  | -2.878341 | 3.689716  | 1.302071  | H  | -6.830528 | -1.849233 | 2.963798  |
| C  | -1.087488 | 3.921820  | 3.095420  | H  | -7.036084 | -0.135594 | 2.498419  |
| H  | -2.855905 | 5.963577  | 2.770331  | H  | -7.141141 | -1.430013 | 1.253282  |
| H  | -1.227834 | 6.578060  | 2.367436  | H  | -4.279318 | -3.455784 | 2.215835  |
| H  | -2.480968 | 6.420231  | 1.083965  | H  | -4.590515 | -3.082554 | 0.488856  |
| H  | -3.660185 | 3.738868  | 2.088998  | H  | -2.991812 | -2.690848 | 1.231126  |
| H  | -3.306362 | 4.122833  | 0.373274  | H  | -4.153485 | -1.147601 | 4.350584  |
| H  | -2.645046 | 2.623031  | 1.124804  | H  | -2.802179 | -0.408163 | 3.432682  |
| H  | -1.867110 | 4.014172  | 3.880657  | H  | -4.260473 | 0.566644  | 3.825139  |
| H  | -0.811212 | 2.853894  | 3.021239  | C  | 6.605069  | 1.105066  | 2.170199  |
| H  | -0.195325 | 4.490190  | 3.431693  | C  | 4.086050  | 2.718081  | 1.408064  |
| C  | 2.061528  | -5.946002 | 1.996185  | C  | 3.906241  | 0.442648  | 3.528232  |
| C  | 2.878341  | -3.689716 | 1.302071  | H  | 6.830528  | 1.849233  | 2.963798  |
| C  | 1.087488  | -3.921820 | 3.095420  | H  | 7.036084  | 0.135594  | 2.498419  |
| H  | 2.855905  | -5.963577 | 2.770331  | H  | 7.141141  | 1.430013  | 1.253282  |
| H  | 1.227834  | -6.578060 | 2.367436  | H  | 4.279318  | 3.455784  | 2.215835  |
| H  | 2.480968  | -6.420231 | 1.083965  | H  | 4.590515  | 3.082554  | 0.488856  |
| H  | 3.660185  | -3.738868 | 2.088998  | H  | 2.991812  | 2.690848  | 1.231126  |
| H  | 3.306362  | -4.122833 | 0.373274  | H  | 4.153485  | 1.147601  | 4.350584  |
| H  | 2.645046  | -2.623031 | 1.124804  | H  | 2.802179  | 0.408163  | 3.432682  |
| H  | 1.867110  | -4.014172 | 3.880657  | H  | 4.260473  | -0.566644 | 3.825139  |
| H  | 0.811212  | -2.853894 | 3.021239  | Si | 4.723613  | 1.008743  | 1.917210  |
| H  | 0.195325  | -4.490190 | 3.431693  | Si | -4.723613 | -1.008743 | 1.917210  |
| Cl | 1.833852  | 0.272300  | 2.692602  | Cl | 0.022025  | 1.850944  | 2.561775  |
| Cl | -1.833852 | -0.272300 | 2.692602  | Cl | -0.022025 | -1.850944 | 2.561775  |

| 23 |           |           |           | 24 |           |           |           |
|----|-----------|-----------|-----------|----|-----------|-----------|-----------|
| Zr | 0.000000  | 0.000000  | 1.475930  | Zr | 0.000000  | 0.000000  | 1.366327  |
| N  | -1.177922 | 1.032889  | -0.388202 | N  | 1.504514  | 0.297136  | -0.513654 |
| C  | -2.238823 | 0.545435  | -0.993161 | C  | 1.748997  | 1.432866  | -1.131550 |
| C  | -2.969057 | -0.662962 | -0.690286 | C  | 1.267294  | 2.755119  | -0.812674 |
| C  | -2.581810 | -1.560234 | 0.362616  | C  | 0.381303  | 3.010194  | 0.285678  |
| C  | -3.372212 | -2.711583 | 0.612710  | C  | 0.000000  | 4.349709  | 0.605141  |
| C  | -4.510542 | -2.967666 | -0.156881 | C  | 0.493243  | 5.388017  | -0.199461 |
| C  | -4.899561 | -2.093188 | -1.199359 | C  | 1.349515  | 5.150989  | -1.300615 |
| C  | -4.133138 | -0.957138 | -1.455630 | C  | 1.734940  | 3.846961  | -1.598808 |
| O  | -1.511482 | -1.313671 | 1.091555  | O  | -0.074010 | 2.010059  | 1.017495  |
| C  | -0.657255 | 2.253827  | -0.930800 | C  | 2.145244  | -0.860867 | -1.065097 |
| H  | -2.660353 | 1.140378  | -1.832460 | H  | 2.449021  | 1.395442  | -1.994383 |
| H  | -4.424949 | -0.259757 | -2.258814 | H  | 2.415595  | 3.641991  | -2.441726 |
| H  | -3.062148 | -3.382572 | 1.427122  | H  | 0.200852  | 6.423660  | 0.042338  |
| H  | -5.113673 | -3.865502 | 0.054578  | H  | 1.713671  | 5.993891  | -1.907313 |
| H  | -5.798742 | -2.305424 | -1.797099 | N  | -1.504514 | -0.297136 | -0.513654 |
| N  | 1.177922  | -1.032889 | -0.388202 | C  | -1.748997 | -1.432866 | -1.131550 |
| C  | 2.238823  | -0.545435 | -0.993161 | C  | -1.267294 | -2.755119 | -0.812674 |
| C  | 2.969057  | 0.662962  | -0.690286 | C  | 0.381303  | -3.010194 | 0.285678  |
| C  | 2.581810  | 1.560234  | 0.362616  | C  | 0.000000  | -4.349709 | 0.605141  |
| C  | 3.372212  | 2.711583  | 0.612710  | C  | 0.493243  | -5.388017 | -0.199461 |
| C  | 4.510542  | 2.967666  | -0.156881 | C  | -1.349515 | -5.150989 | -1.300615 |
| C  | 4.899561  | 2.093188  | -1.199359 | C  | -1.734940 | -3.846961 | -1.598808 |
| C  | 4.133138  | 0.957138  | -1.455630 | O  | 0.074010  | -2.010059 | 1.017495  |
| O  | 1.511482  | 1.313671  | 1.091555  | C  | -2.145244 | 0.860867  | -1.065097 |
| C  | 0.657255  | -2.253827 | -0.930800 | H  | -2.449021 | -1.395442 | -1.994383 |
| H  | 2.660353  | -1.140378 | -1.832460 | H  | -2.415595 | -3.641991 | -2.441726 |
| H  | 4.424949  | 0.259757  | -2.258814 | H  | 0.200852  | -6.423660 | 0.042338  |
| H  | 3.062148  | 3.382572  | 1.427122  | H  | -1.713671 | -5.993891 | -1.907313 |
| H  | 5.113673  | 3.865502  | 0.054578  | C  | 1.965982  | -1.207874 | -2.423300 |
| H  | 5.798742  | 2.305424  | -1.797099 | C  | 2.610573  | -2.337528 | -2.955060 |
| C  | -0.304349 | 2.340098  | -2.296618 | C  | 3.440469  | -3.126163 | -2.140796 |
| C  | 0.198837  | 3.542242  | -2.821861 | C  | 3.618492  | -2.780519 | -0.788353 |
| C  | 0.349731  | 4.666644  | -1.993289 | C  | 2.971195  | -1.660377 | -0.244320 |
| C  | 0.000000  | 4.579609  | -0.632918 | H  | 1.303326  | -0.595720 | -3.055389 |
| C  | -0.493690 | 3.381117  | -0.095493 | H  | 2.456851  | -2.603750 | -4.012888 |
| H  | -0.408053 | 1.451409  | -2.939237 | H  | 3.946331  | -4.010882 | -2.558011 |
| H  | 0.479744  | 3.595443  | -3.885742 | H  | 4.274681  | -3.388777 | -0.145716 |
| H  | 0.744034  | 5.608837  | -2.405097 | H  | 3.108394  | -1.378864 | 0.810661  |
| H  | 0.110034  | 5.458247  | 0.022276  | C  | -1.965982 | 1.207874  | -2.423300 |
| H  | -0.771858 | 3.305721  | 0.966409  | C  | -2.610573 | 2.337528  | -2.955060 |
| C  | 0.304349  | -2.340098 | -2.296618 | C  | -3.440469 | 3.126163  | -2.140796 |
| C  | -0.198837 | -3.542242 | -2.821861 | C  | -3.618492 | 2.780519  | -0.788353 |
| C  | -0.349731 | -4.666644 | -1.993289 | C  | -2.971195 | 1.660377  | -0.244320 |
| C  | 0.000000  | -4.579609 | -0.632918 | H  | -1.303326 | 0.595720  | -3.055389 |
| C  | 0.493690  | -3.381117 | -0.095493 | H  | -2.456851 | 2.603750  | -4.012888 |
| H  | 0.408053  | -1.451409 | -2.939237 | H  | -3.946331 | 4.010882  | -2.558011 |
| H  | -0.479744 | -3.595443 | -3.885742 | H  | -4.274681 | 3.388777  | -0.145716 |
| H  | -0.744034 | -5.608837 | -2.405097 | H  | -3.108394 | 1.378864  | 0.810661  |
| H  | -0.110034 | -5.458247 | 0.022276  | C  | -0.899334 | 4.591771  | 1.789197  |
| H  | 0.771858  | -3.305721 | 0.966409  | H  | -0.443309 | 4.197994  | 2.722223  |
| Cl | -1.222969 | 1.457917  | 2.991780  | H  | -1.105921 | 5.671268  | 1.924962  |
| Cl | 1.222969  | -1.457917 | 2.991780  | H  | -1.865271 | 4.057270  | 1.672286  |
|    |           |           |           | C  | 0.899334  | -4.591771 | 1.789197  |
|    |           |           |           | H  | 0.443309  | -4.197994 | 2.722223  |
|    |           |           |           | H  | 1.105921  | -5.671268 | 1.924962  |
|    |           |           |           | H  | 1.865271  | -4.057270 | 1.672286  |
|    |           |           |           | Cl | 1.910235  | 0.032145  | 2.879538  |
|    |           |           |           | Cl | -1.910235 | -0.032145 | 2.879538  |

| 25 |           |           |           | 26 |           |           |           |
|----|-----------|-----------|-----------|----|-----------|-----------|-----------|
| Zr | 0.000000  | 0.000000  | 0.955232  | Zr | 0.000000  | 0.000000  | 0.790099  |
| N  | 1.372551  | 0.557063  | -0.941940 | N  | -0.851704 | 1.211410  | -1.114682 |
| C  | 1.414568  | 1.732196  | -1.534991 | C  | -2.012051 | 0.999713  | -1.700028 |
| C  | 0.806527  | 2.979587  | -1.140561 | C  | -3.084216 | 0.123885  | -1.296971 |
| C  | 0.000000  | 3.109492  | 0.043184  | C  | -3.016312 | -0.710639 | -0.128131 |
| C  | -0.434879 | 4.406389  | 0.484872  | C  | -4.163613 | -1.440416 | 0.312438  |
| C  | -0.112526 | 5.496370  | -0.344340 | C  | -5.321038 | -1.368066 | -0.486956 |
| C  | 0.624864  | 5.374304  | -1.544590 | C  | -5.389950 | -0.601446 | -1.674343 |
| C  | 1.097509  | 4.126270  | -1.930531 | C  | -4.284326 | 0.149704  | -2.062163 |
| O  | -0.302695 | 2.010646  | 0.710649  | O  | -1.881279 | -0.775670 | 0.547331  |
| C  | 2.138048  | -0.480678 | -1.569833 | C  | 0.000000  | 2.173935  | -1.750026 |
| H  | 2.050478  | 1.807598  | -2.443398 | H  | -2.234602 | 1.607793  | -2.603506 |
| H  | 1.710672  | 4.009124  | -2.839353 | H  | -4.326742 | 0.786295  | -2.961937 |
| H  | -0.442770 | 6.501707  | -0.046946 | H  | -6.219693 | -1.925104 | -0.174439 |
| H  | 0.838397  | 6.268393  | -2.149798 | H  | -6.316148 | -0.582062 | -2.268783 |
| N  | -1.372551 | -0.557063 | -0.941940 | N  | 0.851704  | -1.211410 | -1.114682 |
| C  | -1.414568 | -1.732196 | -1.534991 | C  | 2.012051  | -0.999713 | -1.700028 |
| C  | -0.806527 | -2.979587 | -1.140561 | C  | 3.084216  | -0.123885 | -1.296971 |
| C  | 0.000000  | -3.109492 | 0.043184  | C  | 3.016312  | 0.710639  | -0.128131 |
| C  | 0.434879  | -4.406389 | 0.484872  | C  | 4.163613  | 1.440416  | 0.312438  |
| C  | 0.112526  | -5.496370 | -0.344340 | C  | 5.321038  | 1.368066  | -0.486956 |
| C  | -0.624864 | -5.374304 | -1.544590 | C  | 5.389950  | 0.601446  | -1.674343 |
| C  | -1.097509 | -4.126270 | -1.930531 | C  | 4.284326  | -0.149704 | -2.062163 |
| O  | 0.302695  | -2.010646 | 0.710649  | O  | 1.881279  | 0.775670  | 0.547331  |
| C  | -2.138048 | 0.480678  | -1.569833 | C  | 0.000000  | -2.173935 | -1.750026 |
| H  | -2.050478 | -1.807598 | -2.443398 | H  | 2.234602  | -1.607793 | -2.603506 |
| H  | -1.710672 | -4.009124 | -2.839353 | H  | 4.326742  | -0.786295 | -2.961937 |
| H  | 0.442770  | -6.501707 | -0.046946 | H  | 6.219693  | 1.925104  | -0.174439 |
| H  | -0.838397 | -6.268393 | -2.149798 | H  | 6.316148  | 0.582062  | -2.268783 |
| C  | 1.942997  | -0.801764 | -2.932747 | C  | 0.330361  | 2.057829  | -3.119955 |
| C  | 2.716883  | -1.803011 | -3.541975 | C  | 1.154237  | 3.016301  | -3.732960 |
| C  | 3.693957  | -2.489144 | -2.801007 | C  | 1.651275  | 4.099673  | -2.989140 |
| C  | 3.887600  | -2.170283 | -1.444528 | C  | 1.322928  | 4.214987  | -1.626082 |
| C  | 3.112186  | -1.178792 | -0.823485 | C  | 0.509302  | 3.257175  | -1.001508 |
| H  | 1.173036  | -0.266248 | -3.509980 | H  | -0.053281 | 1.202526  | -3.697997 |
| H  | 2.550544  | -2.049032 | -4.602792 | H  | 1.411578  | 2.910619  | -4.798880 |
| H  | 4.302173  | -3.273164 | -3.278438 | H  | 2.296362  | 4.851777  | -3.469519 |
| H  | 4.657792  | -2.696056 | -0.858726 | H  | 1.700237  | 5.065701  | -1.037473 |
| H  | 3.265513  | -0.917428 | 0.234255  | H  | 0.242782  | 3.345813  | 0.061896  |
| C  | -1.942997 | 0.801764  | -2.932747 | C  | -0.330361 | -2.057829 | -3.119955 |
| C  | -2.716883 | 1.803011  | -3.541975 | C  | -1.154237 | -3.016301 | -3.732960 |
| C  | -3.693957 | 2.489144  | -2.801007 | C  | -1.651275 | -4.099673 | -2.989140 |
| C  | -3.887600 | 2.170283  | -1.444528 | C  | -1.322928 | -4.214987 | -1.626082 |
| C  | -3.112186 | 1.178792  | -0.823485 | C  | -0.509302 | -3.257175 | -1.001508 |
| H  | -1.173036 | 0.266248  | -3.509980 | H  | 0.053281  | 1.202526  | -3.697997 |
| H  | -2.550544 | 2.049032  | -4.602792 | H  | -1.411578 | -2.910619 | -4.798880 |
| H  | -4.302173 | 3.273164  | -3.278438 | H  | -2.296362 | -4.851777 | -3.469519 |
| H  | -4.657792 | 2.696056  | -0.858726 | H  | -1.700237 | -5.065701 | -1.037473 |
| H  | -3.265513 | 0.917428  | 0.234255  | H  | 0.242782  | 3.345813  | 0.061896  |
| C  | -1.176982 | 4.598849  | 1.828126  | C  | -2.874725 | -3.757920 | 2.040592  |
| C  | 1.176982  | -4.598849 | 1.828126  | H  | -3.012168 | -4.473311 | 1.203150  |
| C  | -2.502808 | 3.796187  | 1.842926  | H  | -1.846311 | -3.345569 | 1.994320  |
| H  | -3.166543 | 4.114201  | 1.011739  | H  | -2.969408 | -4.325200 | 2.991439  |
| H  | -2.323825 | 2.708540  | 1.756928  | C  | 2.874725  | 3.757920  | 2.040592  |
| H  | -3.040930 | 3.977282  | 2.797682  | C  | 3.012168  | 4.473311  | 1.203150  |
| C  | 2.502808  | -3.796187 | 1.842926  | H  | 1.846311  | 3.345569  | 1.994320  |
| H  | 3.166543  | -4.114201 | 1.011739  | H  | 2.969408  | 4.325200  | 2.991439  |
| H  | 2.323825  | -2.708540 | 1.756928  | C  | 3.879762  | 1.139887  | 3.393143  |
| H  | 3.040930  | -3.977282 | 2.797682  | H  | 2.892137  | 0.644248  | 3.300321  |
| C  | 0.258609  | -4.123042 | 2.986856  | H  | 4.659511  | 0.349508  | 3.399151  |
| H  | -0.016749 | -3.056133 | 2.885090  | H  | 3.911729  | 1.658528  | 4.375207  |
| H  | -0.676242 | -4.720939 | 3.021449  | C  | 5.893521  | 3.156252  | 2.195271  |
| H  | 0.779974  | -4.249220 | 3.959456  | H  | 5.939316  | 3.696781  | 3.164916  |
| C  | 1.524025  | -6.083575 | 2.079956  | H  | 6.703323  | 2.396191  | 2.205159  |
| H  | 2.046799  | -6.174757 | 3.054326  | H  | 6.122518  | 3.893711  | 1.396608  |
| H  | 0.619940  | -6.725966 | 2.130846  | C  | -5.893521 | -3.156252 | 2.195271  |
| H  | 2.201666  | -6.495671 | 1.302477  | H  | -5.939316 | -3.696781 | 3.164916  |
| C  | -1.524025 | 6.083575  | 2.079956  | H  | -6.703323 | -2.396191 | 2.205159  |
| H  | -2.046799 | 6.174757  | 3.054326  | H  | -6.122518 | -3.893711 | 1.396608  |
| H  | -0.619940 | 6.725966  | 2.130846  | C  | -3.879762 | -1.139887 | 3.393143  |
| H  | -2.201666 | 6.495671  | 1.302477  | H  | -2.892137 | -0.644248 | 3.300321  |
| C  | -0.258609 | 4.123042  | 2.986856  | H  | -4.659511 | -0.349508 | 3.399151  |
| H  | 0.016749  | 3.056133  | 2.885090  | H  | -3.911729 | -1.658528 | 4.375207  |
| H  | 0.676242  | 4.720939  | 3.021449  | Si | -4.169682 | -2.376291 | 1.986954  |
| H  | -0.779974 | 4.249220  | 3.959456  | Si | 4.169682  | 2.376291  | 1.986954  |
| Cl | 1.925550  | 0.234340  | 2.437349  | Cl | -0.693779 | 1.816888  | 2.263886  |
| Cl | -1.925550 | -0.234340 | 2.437349  | Cl | 0.693779  | -1.816888 | 2.263886  |
